# Supplementary material for: Validation Study of Diabetes Definitions Using Japanese Diagnosis Procedure Combination Data Among Hospitalized Patients
Source: PubMed Central journal article supplement (PMC9939922; doi:10.2188/jea.je20210024), 2023-04-05
Supplement: je-33-165-s001.pdf [file je-33-165-s001.pdf]

**eTable 1.** Antidiabetic drugs for diabetes definition based on DPC data

| Ingredients of medicine | Receipt code (unique to Japanese healthcare data)                                                                                                                   | Pharmacological subgroup of WHO ATC code | Chemical subgroup of WHO ATC code                 | Chemical substance of WHO ATC code | WHO ATC code |
|-------------------------|---------------------------------------------------------------------------------------------------------------------------------------------------------------------|------------------------------------------|---------------------------------------------------|------------------------------------|--------------|
| Insulin (human)         | 620000265, 620008897, 620008907, 620008908, 620008909, 620008932, 622114401, 640407220, 640422068, 640422074, 640453021, 640453031, 642490059, 642490107, 642490115 | INSULINS AND ANALOGUES                   | Insulins and analogues for injection, fast-acting | Insulin (human)                    | A10AB01      |
| Insulin                 | 642490064, 642490065, 642490094, 642490095                                                                                                                          | INSULINS AND ANALOGUES                   | Insulins and analogues for injection, fast-acting | Insulin (beef)                     | A10AB02      |
| Insulin lispro          | 620007460, 620008916, 622642701, 640451027, 640451028, 640451029                                                                                                    | INSULINS AND ANALOGUES                   | Insulins and analogues for injection, fast-acting | Insulin lispro                     | A10AB04      |
| Insulin aspart          | 620008893, 620008894, 620008895, 621926901, 622252701, 640451038, 640451040, 640451041                                                                              | INSULINS AND ANALOGUES                   | Insulins and analogues for injection, fast-acting | Insulin aspart                     | A10AB05      |
| Insulin glulisine       | 621911101, 621911201, 621911301                                                                                                                                     | INSULINS AND ANALOGUES                   | Insulins and analogues for injection, fast-acting | Insulin glulisine                  | A10AB06      |
| Insulin (human)         | 620000266, 620008898, 620008910, 620008911, 620008912, 620008933, 622114501, 640407221, 640412085,                                                                  | INSULINS AND ANALOGUES                   | Insulins and analogues for                        | Insulin (human)                    | A10AC01      |

|                  |                                                                                                                                                                                                                                                                                                                                                                                              |                           |                                                                                                             |                 |         |
|------------------|----------------------------------------------------------------------------------------------------------------------------------------------------------------------------------------------------------------------------------------------------------------------------------------------------------------------------------------------------------------------------------------------|---------------------------|-------------------------------------------------------------------------------------------------------------|-----------------|---------|
|                  | 640422069, 640453022, 642490061,<br>642490112, 642490123, 642490138                                                                                                                                                                                                                                                                                                                          |                           | injection,<br>intermediate-acting                                                                           |                 |         |
| Insulin zinc     | 642490066, 642490071, 642490099,<br>642490103                                                                                                                                                                                                                                                                                                                                                | INSULINS AND<br>ANALOGUES | Insulins and<br>analogues for<br>injection,<br>intermediate-acting                                          | Insulin (beef)  | A10AC02 |
| Isophane insulin | 642490063, 642490092                                                                                                                                                                                                                                                                                                                                                                         | INSULINS AND<br>ANALOGUES | Insulins and<br>analogues for<br>injection,<br>intermediate-acting                                          | Insulin (pork)  | A10AC03 |
| Insulin lispro   | 620002441, 620002444, 620007459                                                                                                                                                                                                                                                                                                                                                              | INSULINS AND<br>ANALOGUES | Insulins and<br>analogues for<br>injection,<br>intermediate-acting                                          | Insulin lispro  | A10AC04 |
| Insulin (human)  | 620000202, 620000203, 620000204,<br>620000205, 620000267, 620000268,<br>620000269, 620000270, 620000271,<br>620008899, 620008913, 620008914,<br>620008915, 620008934, 620008935,<br>620008936, 622114601, 640406239,<br>640407222, 640412080, 640412081,<br>640412082, 640412083, 640412084,<br>640422067, 640453023, 642490121,<br>642490133, 642490134, 642490135,<br>642490136, 642490137 | INSULINS AND<br>ANALOGUES | Insulins and<br>analogues for<br>injection,<br>intermediate- or<br>long-acting combined<br>with fast-acting | Insulin (human) | A10AD01 |

|                                        |                                                                     |                           |                                                                                                             |                                        |         |
|----------------------------------------|---------------------------------------------------------------------|---------------------------|-------------------------------------------------------------------------------------------------------------|----------------------------------------|---------|
| Insulin lispro                         | 620002439, 620002440, 620002442,<br>620002443, 620007461, 620007462 | INSULINS AND<br>ANALOGUES | Insulins and<br>analogues for<br>injection,<br>intermediate- or<br>long-acting combined<br>with fast-acting | Insulin lispro                         | A10AD04 |
| Insulin aspart                         | 620000447, 620000448, 620008896,<br>621973201, 621973301            | INSULINS AND<br>ANALOGUES | Insulins and<br>analogues for<br>injection,<br>intermediate- or<br>long-acting combined<br>with fast-acting | Insulin aspart                         | A10AD05 |
| Insulin degludec and Insulin<br>aspart | 622450901, 622451001                                                | INSULINS AND<br>ANALOGUES | Insulins and<br>analogues for<br>injection,<br>intermediate- or<br>long-acting combined<br>with fast-acting | Insulin degludec<br>and Insulin aspart | A10AD06 |
| Insulin (human)                        | 642490109, 642490125                                                | INSULINS AND<br>ANALOGUES | Insulins and<br>analogues for<br>injection, long-acting                                                     | Insulin (human)                        | A10AE01 |
| Insulin zinc                           | 642490068, 642490101                                                | INSULINS AND<br>ANALOGUES | Insulins and<br>analogues for<br>injection, long-acting                                                     | Insulin (beef)                         | A10AE02 |

|                   |                                                                                                                                                                                                                                                                                                                                                                     |                                                          |                                                         |                  |         |
|-------------------|---------------------------------------------------------------------------------------------------------------------------------------------------------------------------------------------------------------------------------------------------------------------------------------------------------------------------------------------------------------------|----------------------------------------------------------|---------------------------------------------------------|------------------|---------|
| Protamine insulin | 642490070, 642490104                                                                                                                                                                                                                                                                                                                                                | INSULINS AND<br>ANALOGUES                                | Insulins and<br>analogues for<br>injection, long-acting | Insulin (beef)   | A10AE02 |
| Insulin glargine  | 620000442, 620000443, 620002445,<br>620004781, 620007536, 620008942,<br>620008943, 620008944, 620008945,<br>622410901, 622411001, 622440701,<br>622484801                                                                                                                                                                                                           | INSULINS AND<br>ANALOGUES                                | Insulins and<br>analogues for<br>injection, long-acting | Insulin glargine | A10AE04 |
| Insulin detemir   | 620005900, 620005901, 620008952,<br>620008953, 621927001                                                                                                                                                                                                                                                                                                            | INSULINS AND<br>ANALOGUES                                | Insulins and<br>analogues for<br>injection, long-acting | Insulin detemir  | A10AE05 |
| Insulin degludec  | 622198901, 622199001                                                                                                                                                                                                                                                                                                                                                | INSULINS AND<br>ANALOGUES                                | Insulins and<br>analogues for<br>injection, long-acting | Insulin degludec | A10AE06 |
| Metformin         | 610444147, 610463145, 613960009,<br>613960032, 620002859, 620004480,<br>620005570, 620009133, 621676001,<br>621974701, 622070801, 622242501,<br>622412701, 622417101, 622417201,<br>622421101, 622421201, 622421901,<br>622422001, 622424401, 622424501,<br>622427201, 622427301, 622432601,<br>622432701, 622436301, 622438401,<br>622438501, 622448601, 622466601 | BLOOD<br>GLUCOSE<br>LOWERING<br>DRUGS, EXCL.<br>INSULINS | Biguanides                                              | Metformin        | A10BA02 |

|               |                                                                                                                                                                                                                                                                                                                                                                      |                                                          |               |               |         |
|---------------|----------------------------------------------------------------------------------------------------------------------------------------------------------------------------------------------------------------------------------------------------------------------------------------------------------------------------------------------------------------------|----------------------------------------------------------|---------------|---------------|---------|
| Buformin      | 613960014, 613960015, 613960036,<br>620004502, 620005979, 620006872                                                                                                                                                                                                                                                                                                  | BLOOD<br>GLUCOSE<br>LOWERING<br>DRUGS, EXCL.<br>INSULINS | Biguanides    | Buformin      | A10BA03 |
| Glycopyramide | 613960011, 613960012, 620003144,<br>620003145                                                                                                                                                                                                                                                                                                                        | BLOOD<br>GLUCOSE<br>LOWERING<br>DRUGS, EXCL.<br>INSULINS | Sulfonylureas |               | A10BB   |
| Glybuzole     | 613960020, 620006030                                                                                                                                                                                                                                                                                                                                                 | BLOOD<br>GLUCOSE<br>LOWERING<br>DRUGS, EXCL.<br>INSULINS | Sulfonylureas |               | A10BB   |
| Glibenclamide | 610407055, 610412056, 610433079,<br>610441042, 610441043, 610453088,<br>613960002, 613960003, 613960018,<br>613960019, 613960038, 613960039,<br>613960074, 613960076, 613960077,<br>613960078, 613960079, 613960080,<br>620000732, 620003159, 620003160,<br>620003604, 620006890, 620871407,<br>620871601, 620871907, 620872001,<br>620872002, 620872003, 620872004, | BLOOD<br>GLUCOSE<br>LOWERING<br>DRUGS, EXCL.<br>INSULINS | Sulfonylureas | Glibenclamide | A10BB01 |

---

620872009, 620872016, 622009801,  
622009802, 622013401, 622018801,  
622018802, 622036001, 622036002,  
622039901, 622075601, 622103201

---

|                |                                                                                                                                                                                                                                                                                                                                  |                                                          |               |                |         |
|----------------|----------------------------------------------------------------------------------------------------------------------------------------------------------------------------------------------------------------------------------------------------------------------------------------------------------------------------------|----------------------------------------------------------|---------------|----------------|---------|
| Chlorpropamide | 613960006, 613960008, 613960041,<br>620009209                                                                                                                                                                                                                                                                                    | BLOOD<br>GLUCOSE<br>LOWERING<br>DRUGS, EXCL.<br>INSULINS | Sulfonylureas | Chlorpropamide | A10BB02 |
| Tolbutamide    | 613960026, 613960027, 613960028,<br>613960050, 613960053, 613960054,<br>613960057, 613960058, 613960060,<br>613960064, 613960067, 613960068,<br>620003277, 620003452, 620004289,<br>620004842, 620006590                                                                                                                         | BLOOD<br>GLUCOSE<br>LOWERING<br>DRUGS, EXCL.<br>INSULINS | Sulfonylureas | Tolbutamide    | A10BB03 |
| Gliclazide     | 610406257, 610406276, 610406357,<br>613960037, 613960070, 613960071,<br>613960072, 613960073, 613960075,<br>620002029, 620002030, 620002031,<br>620002032, 620002717, 620003568,<br>620003661, 620003947, 620003948,<br>620004482, 620004580, 620006891,<br>620873202, 620873301, 620873402,<br>620873702, 622005801, 622005802, | BLOOD<br>GLUCOSE<br>LOWERING<br>DRUGS, EXCL.<br>INSULINS | Sulfonylureas | Gliclazide     | A10BB09 |

---

---

622141301, 622141302, 622143401,  
622143402, 622169101, 622169102,  
622313200

---

Glimepiride

610443002, 610443003, 621982701,  
621997001, 621997101, 621998701,  
621998801, 621998901, 621999001,  
621999301, 621999401, 621999701,  
621999801, 622000601, 622000701,  
622001701, 622001801, 622004701,  
622004702, 622004801, 622004802,  
622005501, 622005601, 622008701,  
622008801, 622009901, 622010001,  
622011401, 622011501, 622011601,  
622011701, 622013501, 622013601,  
622016001, 622016101, 622017301,  
622017401, 622017501, 622017901,  
622018001, 622020901, 622020903,  
622021001, 622021003, 622021801,  
622021901, 622022001, 622022101,  
622023501, 622023601, 622025201,  
622025301, 622025801, 622025901,  
622026501, 622026601, 622029901,  
622030001, 622031401, 622031501,

BLOOD  
GLUCOSE  
LOWERING  
DRUGS, EXCL.  
INSULINS

Sulfonylureas

Glimepiride

A10BB12

---

---

622033001, 622033101, 622033201,  
622033701, 622033801, 622035701,  
622035801, 622037901, 622038001,  
622038801, 622038901, 622058801,  
622058901, 622059001, 622059002,  
622059101, 622059102, 622088301,  
622088401, 622114701, 622114801,  
622118501, 622122201, 622122301,  
622127301, 622127401, 622127501,  
622128101, 622137701, 622141101,  
622144001, 622159301, 622169301,  
622171301, 622176301, 622177501,  
622186201, 622187301, 622190001,  
622190002, 622190801, 622193301,  
622194901, 622198001, 622202201,  
622202801, 622205101, 622205501,  
622208901, 622211501, 622217701,  
622219701, 622221001, 622222001,  
622242001, 622246801, 622252501,  
622254701, 622271101, 622271201,  
622271301, 622313300, 622338501,  
622338601, 622338701, 622631401,  
622636501, 622636601

---

Acetohexamide

613960017, 620000048

BLOOD  
GLUCOSE

Sulfonylureas

Acetohexamide

A10BB31

---



|                                    |                      |                                                          |                                                         |                               |         |
|------------------------------------|----------------------|----------------------------------------------------------|---------------------------------------------------------|-------------------------------|---------|
|                                    |                      | LOWERING<br>DRUGS, EXCL.<br>INSULINS                     |                                                         |                               |         |
| Sitagliptin phosphate              | 622625702            | BLOOD<br>GLUCOSE<br>LOWERING<br>DRUGS, EXCL.<br>INSULINS | Combinations of oral<br>blood glucose<br>lowering drugs |                               | A10BD   |
| Teneligliptin hydrobromide hydrate | 622573601            | BLOOD<br>GLUCOSE<br>LOWERING<br>DRUGS, EXCL.<br>INSULINS | Combinations of oral<br>blood glucose<br>lowering drugs |                               | A10BD   |
| Mitiglinide calcium                | 622053601            | BLOOD<br>GLUCOSE<br>LOWERING<br>DRUGS, EXCL.<br>INSULINS | Combinations of oral<br>blood glucose<br>lowering drugs |                               | A10BD   |
| Pioglitazone hydrochloride         | 621986301, 621986401 | BLOOD<br>GLUCOSE<br>LOWERING<br>DRUGS, EXCL.<br>INSULINS | Combinations of oral<br>blood glucose<br>lowering drugs | Metformin and<br>pioglitazone | A10BD05 |

|                            |                                                                                                                                                                                  |                                                          |                                                         |                                 |         |
|----------------------------|----------------------------------------------------------------------------------------------------------------------------------------------------------------------------------|----------------------------------------------------------|---------------------------------------------------------|---------------------------------|---------|
| Pioglitazone hydrochloride | 622048401, 622048501                                                                                                                                                             | BLOOD<br>GLUCOSE<br>LOWERING<br>DRUGS, EXCL.<br>INSULINS | Combinations of oral<br>blood glucose<br>lowering drugs | Glimepiride and<br>pioglitazone | A10BD06 |
| Metformin and vildagliptin | 622450301, 622450401                                                                                                                                                             | BLOOD<br>GLUCOSE<br>LOWERING<br>DRUGS, EXCL.<br>INSULINS | Combinations of oral<br>blood glucose<br>lowering drugs | Metformin and<br>vildagliptin   | A10BD08 |
| Alogliptin benzoate        | 622086001, 622086101                                                                                                                                                             | BLOOD<br>GLUCOSE<br>LOWERING<br>DRUGS, EXCL.<br>INSULINS | Combinations of oral<br>blood glucose<br>lowering drugs | Pioglitazone and<br>alogliptin  | A10BD09 |
| Alogliptin benzoate        | 622517101                                                                                                                                                                        | BLOOD<br>GLUCOSE<br>LOWERING<br>DRUGS, EXCL.<br>INSULINS | Combinations of oral<br>blood glucose<br>lowering drugs | Metformin and<br>alogliptin     | A10BD13 |
| Acarbose                   | 613960081, 613960082, 620005359,<br>620005360, 620009286, 620009287,<br>620009288, 620009289, 620009290,<br>620009291, 620009292, 620009293,<br>620009294, 620009295, 620009296, | BLOOD<br>GLUCOSE<br>LOWERING<br>DRUGS, EXCL.<br>INSULINS | Alpha glucosidase<br>inhibitors                         | Acarbose                        | A10BF01 |

|           |                                                                                                                                                                                                                                                                                                                                                                                                                                                                                  |                                                          |                                 |           |         |
|-----------|----------------------------------------------------------------------------------------------------------------------------------------------------------------------------------------------------------------------------------------------------------------------------------------------------------------------------------------------------------------------------------------------------------------------------------------------------------------------------------|----------------------------------------------------------|---------------------------------|-----------|---------|
|           | 620009297, 621784902, 621785002,<br>621896402, 621896502, 621937101,<br>621937201, 621942101, 621942102,<br>621942201, 621942202, 621958701,<br>621958801, 622008501, 622008502,<br>622008601, 622008602, 622302201,<br>622302301                                                                                                                                                                                                                                                |                                                          |                                 |           |         |
| Miglitol  | 620003127, 620003128, 620003129,<br>622426601, 622426701, 622432501,<br>622544301, 622544401, 622544501,<br>622560201, 622560301, 622560401,<br>622628601, 622628701, 622628801                                                                                                                                                                                                                                                                                                  | BLOOD<br>GLUCOSE<br>LOWERING<br>DRUGS, EXCL.<br>INSULINS | Alpha glucosidase<br>inhibitors | Miglitol  | A10BF02 |
| Voglibose | 610406390, 610406391, 620002120,<br>620002121, 620002730, 620002731,<br>620002810, 620002811, 620002812,<br>620002813, 620002815, 620002816,<br>620002824, 620002825, 620002826,<br>620002827, 620002828, 620002829,<br>620002835, 620002836, 620002837,<br>620002838, 620002839, 620002840,<br>620002841, 620002842, 620002843,<br>620002844, 620002845, 620002846,<br>620002847, 620002848, 620004045,<br>620004046, 620004069, 620004070,<br>620004071, 620004072, 620004073, | BLOOD<br>GLUCOSE<br>LOWERING<br>DRUGS, EXCL.<br>INSULINS | Alpha glucosidase<br>inhibitors | Voglibose | A10BF03 |

---

620004074, 620005557, 620005558,  
620005559, 620005560, 620005561,  
620005562, 620005563, 620005564,  
620005565, 620005566, 620006682,  
620006683, 620008071, 620008072,  
620008073, 620008074, 620008075,  
620008076, 620008726, 620008727,  
620008728, 620008729, 621665301,  
621665401, 621673501, 621673601,  
621683401, 621683501, 621689001,  
621689101, 621689303, 621689403,  
621690203, 621690303, 621690402,  
621690502, 621690901, 621691001,  
621691201, 621691601, 621943301,  
621943401, 621953301, 621953401,  
622090001, 622090101

---

---

|              |                                                                                                                                                                                                                                                                                                                                                                                                                                                                                                                                                                                                                                                                                                                                                                                                                                                                                                                                  |                                                          |                    |              |         |
|--------------|----------------------------------------------------------------------------------------------------------------------------------------------------------------------------------------------------------------------------------------------------------------------------------------------------------------------------------------------------------------------------------------------------------------------------------------------------------------------------------------------------------------------------------------------------------------------------------------------------------------------------------------------------------------------------------------------------------------------------------------------------------------------------------------------------------------------------------------------------------------------------------------------------------------------------------|----------------------------------------------------------|--------------------|--------------|---------|
| Pioglitazone | 610432040, 610432041, 621990901,<br>621991001, 622041202, 622041302,<br>622041402, 622041502, 622042901,<br>622043001, 622045201, 622045301,<br>622045401, 622045501, 622046801,<br>622046901, 622047701, 622047801,<br>622049901, 622050001, 622053101,<br>622053201, 622053801, 622055801,<br>622055901, 622056001, 622056101,<br>622059201, 622059301, 622061001,<br>622061401, 622061501, 622061601,<br>622061701, 622062301, 622062302,<br>622062401, 622062402, 622063001,<br>622063101, 622063201, 622063301,<br>622065101, 622065201, 622065301,<br>622065401, 622066201, 622066301,<br>622071701, 622071801, 622071901,<br>622072001, 622078301, 622078401,<br>622079101, 622079201, 622081801,<br>622081901, 622144601, 622144701,<br>622147301, 622147401, 622147501,<br>622147601, 622155701, 622155801,<br>622155901, 622156001, 622156901,<br>622157001, 622159401, 622159501,<br>622163301, 622163401, 622164301, | BLOOD<br>GLUCOSE<br>LOWERING<br>DRUGS, EXCL.<br>INSULINS | Thiazolidinediones | Pioglitazone | A10BG03 |
|--------------|----------------------------------------------------------------------------------------------------------------------------------------------------------------------------------------------------------------------------------------------------------------------------------------------------------------------------------------------------------------------------------------------------------------------------------------------------------------------------------------------------------------------------------------------------------------------------------------------------------------------------------------------------------------------------------------------------------------------------------------------------------------------------------------------------------------------------------------------------------------------------------------------------------------------------------|----------------------------------------------------------|--------------------|--------------|---------|

---

---

622164401, 622166801, 622166901,  
622167201, 622167301, 622172101,  
622172201, 622175401, 622175501,  
622175601, 622175701, 622178601,  
622178701, 622182401, 622182501,  
622320800, 622320900

---

|                                    |                      |                                                          |                                              |       |
|------------------------------------|----------------------|----------------------------------------------------------|----------------------------------------------|-------|
| Anagliptin                         | 622201701            | BLOOD<br>GLUCOSE<br>LOWERING<br>DRUGS, EXCL.<br>INSULINS | Dipeptidyl peptidase<br>4 (DPP-4) inhibitors | A10BH |
| Omarigliptin                       | 622448901, 622449001 | BLOOD<br>GLUCOSE<br>LOWERING<br>DRUGS, EXCL.<br>INSULINS | Dipeptidyl peptidase<br>4 (DPP-4) inhibitors | A10BH |
| Teneligliptin hydrobromide hydrate | 622182601            | BLOOD<br>GLUCOSE<br>LOWERING<br>DRUGS, EXCL.<br>INSULINS | Dipeptidyl peptidase<br>4 (DPP-4) inhibitors | A10BH |

---

|                        |                                                                                              |                                                          |                                              |              |         |
|------------------------|----------------------------------------------------------------------------------------------|----------------------------------------------------------|----------------------------------------------|--------------|---------|
| Trelagliptin succinate | 622415401, 622415501                                                                         | BLOOD<br>GLUCOSE<br>LOWERING<br>DRUGS, EXCL.<br>INSULINS | Dipeptidyl peptidase<br>4 (DPP-4) inhibitors |              | A10BH   |
| Sitagliptin            | 621950901, 621951001, 621951101,<br>621970601, 621970701, 621970801,<br>622277501, 622288401 | BLOOD<br>GLUCOSE<br>LOWERING<br>DRUGS, EXCL.<br>INSULINS | Dipeptidyl peptidase<br>4 (DPP-4) inhibitors | Sitagliptin  | A10BH01 |
| Vildagliptin           | 621980701                                                                                    | BLOOD<br>GLUCOSE<br>LOWERING<br>DRUGS, EXCL.<br>INSULINS | Dipeptidyl peptidase<br>4 (DPP-4) inhibitors | Vildagliptin | A10BH02 |
| Saxagliptin            | 622245601, 622245701                                                                         | BLOOD<br>GLUCOSE<br>LOWERING<br>DRUGS, EXCL.<br>INSULINS | Dipeptidyl peptidase<br>4 (DPP-4) inhibitors | Saxagliptin  | A10BH03 |
| Alogliptin             | 621986001, 621986101, 621986201                                                              | BLOOD<br>GLUCOSE<br>LOWERING<br>DRUGS, EXCL.<br>INSULINS | Dipeptidyl peptidase<br>4 (DPP-4) inhibitors | Alogliptin   | A10BH04 |

|              |                                               |                                                          |                                                 |              |         |
|--------------|-----------------------------------------------|----------------------------------------------------------|-------------------------------------------------|--------------|---------|
| Linagliptin  | 622093501                                     | BLOOD<br>GLUCOSE<br>LOWERING<br>DRUGS, EXCL.<br>INSULINS | Dipeptidyl peptidase<br>4 (DPP-4) inhibitors    | Linagliptin  | A10BH05 |
| Exenatide    | 622038301, 622038401, 622229001,<br>622406001 | BLOOD<br>GLUCOSE<br>LOWERING<br>DRUGS, EXCL.<br>INSULINS | Glucagon-like<br>peptide-1 (GLP-1)<br>analogues | Exenatide    | A10BJ01 |
| Liraglutide  | 621974801                                     | BLOOD<br>GLUCOSE<br>LOWERING<br>DRUGS, EXCL.<br>INSULINS | Glucagon-like<br>peptide-1 (GLP-1)<br>analogues | Liraglutide  | A10BJ02 |
| Lixisenatide | 622267001                                     | BLOOD<br>GLUCOSE<br>LOWERING<br>DRUGS, EXCL.<br>INSULINS | Glucagon-like<br>peptide-1 (GLP-1)<br>analogues | Lixisenatide | A10BJ03 |
| Dulaglutide  | 622442201                                     | BLOOD<br>GLUCOSE<br>LOWERING<br>DRUGS, EXCL.<br>INSULINS | Glucagon-like<br>peptide-1 (GLP-1)<br>analogues | Dulaglutide  | A10BJ05 |



|                        |                      |                                                          |                                                           |               |         |
|------------------------|----------------------|----------------------------------------------------------|-----------------------------------------------------------|---------------|---------|
| Ipragliflozin          | 622306601, 622306701 | BLOOD<br>GLUCOSE<br>LOWERING<br>DRUGS, EXCL.<br>INSULINS | Sodium-glucose co-<br>transporter 2<br>(SGLT2) inhibitors |               | A10BK   |
| Tofogliflozin hydrate  | 622336801, 622340101 | BLOOD<br>GLUCOSE<br>LOWERING<br>DRUGS, EXCL.<br>INSULINS | Sodium-glucose co-<br>transporter 2<br>(SGLT2) inhibitors |               | A10BK   |
| Luseogliflozin hydrate | 622335701, 622335801 | BLOOD<br>GLUCOSE<br>LOWERING<br>DRUGS, EXCL.<br>INSULINS | Sodium-glucose co-<br>transporter 2<br>(SGLT2) inhibitors |               | A10BK   |
| Dapagliflozin          | 622341901, 622342001 | BLOOD<br>GLUCOSE<br>LOWERING<br>DRUGS, EXCL.<br>INSULINS | Sodium-glucose co-<br>transporter 2<br>(SGLT2) inhibitors | Dapagliflozin | A10BK01 |
| Canagliflozin          | 622360601            | BLOOD<br>GLUCOSE<br>LOWERING<br>DRUGS, EXCL.<br>INSULINS | Sodium-glucose co-<br>transporter 2<br>(SGLT2) inhibitors | Canagliflozin | A10BK02 |

|               |                                                                                                                                                                      |                                                          |                                                           |               |         |
|---------------|----------------------------------------------------------------------------------------------------------------------------------------------------------------------|----------------------------------------------------------|-----------------------------------------------------------|---------------|---------|
| Empagliflozin | 622401201, 622401301                                                                                                                                                 | BLOOD<br>GLUCOSE<br>LOWERING<br>DRUGS, EXCL.<br>INSULINS | Sodium-glucose co-<br>transporter 2<br>(SGLT2) inhibitors | Empagliflozin | A10BK03 |
| Repaglinide   | 622040901, 622041001                                                                                                                                                 | BLOOD<br>GLUCOSE<br>LOWERING<br>DRUGS, EXCL.<br>INSULINS | Other blood glucose<br>lowering drugs, excl.<br>insulins  | Repaglinide   | A10BX02 |
| Nateglinide   | 610432026, 610432027, 610432032,<br>610432033, 622119301, 622119401,<br>622196601, 622196701, 622230001,<br>622230101                                                | BLOOD<br>GLUCOSE<br>LOWERING<br>DRUGS, EXCL.<br>INSULINS | Other blood glucose<br>lowering drugs, excl.<br>insulins  | Nateglinide   | A10BX03 |
| Mitiglinide   | 620001907, 620001908, 622462401,<br>622462501, 622515201, 622515301,<br>622518101, 622518201, 622520901,<br>622521001, 622523301, 622523401,<br>622525301, 622525401 | BLOOD<br>GLUCOSE<br>LOWERING<br>DRUGS, EXCL.<br>INSULINS | Other blood glucose<br>lowering drugs, excl.<br>insulins  | Mitiglinide   | A10BX08 |

WHO ATC code: Anatomical Therapeutic Chemical code by the World Health Organization Collaborating Centre for Drug Statistics Methodology; DPC, the Japanese Diagnosis Procedure Combination

**eTable 2.** Characteristics of the participants

|                                             | Diabetes<br>(n=23) | No diabetes<br>(n=49) | Total<br>(n=72) |
|---------------------------------------------|--------------------|-----------------------|-----------------|
| Age, years, mean (SD) <sup>a</sup>          | 67.1 (6.1)         | 64.9 (8.6)            | 65.6 (7.9)      |
| Men, %                                      | 52.2               | 61.2                  | 58.3            |
| BMI, kg/m <sup>2</sup> , mean (SD)          | 24.4(2.4)          | 22.7 (2.8)            | 23.3 (2.8)      |
| Missing, %                                  | 4.3                | 2.0                   | 2.8             |
| Smoking, %                                  |                    |                       |                 |
| Never smoker                                | 43.5               | 49.0                  | 47.2            |
| Current smoker                              | 26.1               | 16.3                  | 19.4            |
| Past smoker                                 | 26.1               | 26.5                  | 26.4            |
| Missing                                     | 4.3                | 8.2                   | 6.9             |
| Alcohol consumption, %                      |                    |                       |                 |
| Nondrinker or occasional drinker (< 1/week) | 52.2               | 40.8                  | 44.4            |
| Regular drinker (≥ 1/week)                  | 30.4               | 53.1                  | 45.8            |
| Past drinker                                | 13.0               | 6.1                   | 8.3             |
| Missing                                     | 4.3                | 0                     | 1.4             |
| Occupation, %                               |                    |                       |                 |
| Agricultural or fishing work                | 26.1               | 20.4                  | 22.2            |
| Inoccupation                                | 26.1               | 20.4                  | 22.2            |
| Homemaker                                   | 21.7               | 20.4                  | 20.8            |
| Professional or technical work              | 13.0               | 12.2                  | 12.5            |
| Service                                     | 4.3                | 8.2                   | 6.9             |
| Transportation or telecommunications        | 0                  | 6.1                   | 4.2             |
| Administrative work                         | 4.3                | 4.1                   | 4.2             |

|                                                                         |         |         |         |
|-------------------------------------------------------------------------|---------|---------|---------|
| Sales                                                                   | 0       | 4.1     | 2.8     |
| Others                                                                  | 0       | 4.1     | 2.8     |
| Missing                                                                 | 4.3     | 0       | 1.4     |
| Number of days on admission based on DPC data, mean (SD)                | 21 (28) | 20 (33) | 20 (31) |
| Emergency admission based on DPC data, %                                | 56.5    | 49.0    | 51.4    |
| Confirmed diabetes diagnosis by chart reviews, n                        | 23      | -       | -       |
| (I) History of treatments                                               | 11      | -       | -       |
| (II) Prescriptions of antidiabetic agents                               | 5       | -       | -       |
| (III) Blood tests (HbA1c or blood glucose)                              | 7       | -       | -       |
| Diabetes definition based on DPC data, n                                |         |         |         |
| (i) Diabetes codes                                                      | 18      | 1       | 19      |
| (ii) Diabetes codes and/or antidiabetic prescriptions                   | 18      | 2       | 20      |
| (iii) Combination of both diabetes codes and antidiabetic prescriptions | 13      | 0       | 13      |

---

DPC, the Japanese Diagnosis Procedure Combination; HbA1c, glycated hemoglobin; SD, standard deviation.

<sup>a</sup> Age was that by the admission date as reported in the DPC data.

**eTable 3.** Frequencies of diabetes diagnosis and validity indices for the DPC data-based definitions including 26 patients<sup>a</sup> who lacked blood test results and any description on diabetes treatment

| Definition on DPC data                                                     | Frequency |    |    |    | Sensitivity, %      | Specificity, %      | PPV, %              | NPV, %              |
|----------------------------------------------------------------------------|-----------|----|----|----|---------------------|---------------------|---------------------|---------------------|
|                                                                            | TP        | FN | FP | TN | (95% CI)            | (95% CI)            | (95% CI)            | (95% CI)            |
| All types of diabetes <sup>b</sup>                                         |           |    |    |    |                     |                     |                     |                     |
| (i) Diabetes codes                                                         | 17        | 2  | 2  | 77 | 89.5<br>(66.9–98.7) | 97.5<br>(91.2–99.7) | 89.5<br>(66.9–98.7) | 97.5<br>(91.2–99.7) |
| (ii) Diabetes codes<br>and/or antidiabetic prescriptions                   | 17        | 2  | 3  | 76 | 89.5<br>(66.9–98.7) | 96.2<br>(89.3–99.2) | 85.0<br>(62.1–96.8) | 97.4<br>(91.0–99.7) |
| (iii) Combination of both diabetes codes<br>and antidiabetic prescriptions | 13        | 6  | 0  | 79 | 68.4<br>(43.4–87.4) | 100<br>(95.4–100)   | 100<br>(75.3–100)   | 92.9<br>(85.3–97.4) |

CI, confidence interval; DPC, Diagnosis Procedure Combination; FN, false negative; FP, false positive; NPV, negative predictive value; PPV, positive predictive value; TN, true negative; TP, true positive.

<sup>a</sup> Twenty-six patients were assumed not to have diabetes.

<sup>b</sup> Diabetes included all types of diabetes. International Classification of Diseases, 10<sup>th</sup> revision codes for the DPC definition are E10x, E11x, E12x, E13x, and E14x.

**eTable 4.** Frequencies of diabetes diagnosis and validity indices for the DPC data-based definitions changing diagnostic criterion (III) (twice for blood glucose levels; or once for blood glucose level and once for HbA1c level)

| Definition on DPC data                                                     | Frequency |    |    |    | Sensitivity, %      | Specificity, %       | PPV, %              | NPV, %              |
|----------------------------------------------------------------------------|-----------|----|----|----|---------------------|----------------------|---------------------|---------------------|
|                                                                            | TP        | FN | FP | TN | (95% CI)            | (95% CI)             | (95% CI)            | (95% CI)            |
| All types of diabetes <sup>a</sup>                                         |           |    |    |    |                     |                      |                     |                     |
| (i) Diabetes codes                                                         | 15        | 2  | 3  | 51 | 88.2<br>(63.6–98.5) | 94.4<br>(84.6–98.8)  | 83.3<br>(58.6–96.4) | 96.2<br>(87.0–99.5) |
| (ii) Diabetes codes<br>and/or antidiabetic prescriptions                   | 15        | 2  | 4  | 50 | 88.2<br>(63.6–98.5) | 92.6<br>(82.1–97.9)  | 78.9<br>(54.4–93.9) | 96.2<br>(86.8–99.5) |
| (iii) Combination of both diabetes codes<br>and antidiabetic prescriptions | 12        | 5  | 1  | 53 | 70.6<br>(44.0–89.7) | 98.1<br>(90.1–99.95) | 92.3<br>(64.0–99.8) | 91.4<br>(81.0–97.1) |

CI, confidence interval; DPC, Diagnosis Procedure Combination; FN, false negative; FP, false positive; HbA1c, glycated hemoglobin; NPV, negative predictive value; PPV, positive predictive value; TN, true negative; TP, true positive.

<sup>a</sup> Diabetes includes all types of diabetes. International Classification of Diseases, 10<sup>th</sup> revision codes for DPC definition are E10x, E11x, E12x, E13x, and E14x.
